# Supplementary material
Source: HighWire-hosted journal article supplement (http://www.jrheum.org/highwire/filestream/29804/field_highwire_adjunct_files/0/160118_Data_Suppl__GRAPPA.pdf)
Supplement: 160118_Data_Suppl__GRAPPA.pdf [file 160118_Data_Suppl__GRAPPA.pdf]

**Supplementary Table 1A: Skin items in first survey. No items were agreed for inclusion by either patients or doctors.**

| <b>Skin items – Please rate the ability of each item to identify flare.<br/>A recent change in:</b> | <b>Patients</b> | <b>Doctors</b> | <b>Patient/doctor concordance about inclusion/exclusion</b> |
|-----------------------------------------------------------------------------------------------------|-----------------|----------------|-------------------------------------------------------------|
| Soreness of my skin                                                                                 | DK              | DK             | N                                                           |
| Feelings of embarrassment/self consciousness about my skin                                          | D               | DK             | N                                                           |
| Feeling miserable about my skin                                                                     | DK              | DK             | N                                                           |
| Itchiness of my skin                                                                                | DK              | DK             | N                                                           |
| Painfulness of my skin                                                                              | D               | DK             | N                                                           |
| Self treatment of skin (use of creams and oils)                                                     | DK              | DK             | N                                                           |
| Location of psoriasis                                                                               | DK              | DK             | N                                                           |
| Needing help to wash                                                                                | D               | DK             | N                                                           |
| Feelings of intimacy, wanting to be touched                                                         | D               | D              | Y                                                           |
| Pitting in nails                                                                                    | DK              | DK             | N                                                           |
| Softness of nails                                                                                   | D               | D              | Y                                                           |
| Sensitivity of hands or soles of feet                                                               | DK              | DK             | N                                                           |
| Cover or hide skin more when in public                                                              | D               | DK             | N                                                           |

A: agree (more than 70% scored the item 6 or above)

D: disagree (more than 70% scored the item as 5 or below)

DK: don't know (no consensus found)

Y = yes; N = no

**Supplementary Table 1B: New skin items agreed in second survey.**

| <b>Skin items – Please rate the ability of each item to identify flare.<br/>A recent change in:</b> | <b>Patients</b> | <b>Doctors</b> | <b>Patient/doctor concordance about inclusion/exclusion</b> |
|-----------------------------------------------------------------------------------------------------|-----------------|----------------|-------------------------------------------------------------|
| Area/amount of skin affected                                                                        | DK              | A              | N                                                           |
| Number, thickness, appearance or location of lesions                                                | DK              | A              | N                                                           |
| Scaling/flakiness of my skin                                                                        | DK              | A              | N                                                           |
| Redness of my skin                                                                                  | DK              | A              | N                                                           |
| Bleeding/crusting of my skin                                                                        | DK              | A              | N                                                           |

A: agree (more than 70% scored the item 6 or above)

D: disagree (more than 70% scored the item as 5 or below)

DK: don't know (no consensus found)

Y = yes; N = no

**Supplementary Table 2A: Joint items in first survey.**

| <b>Joint items – Please rate the ability of each item to identify flare.</b><br><b>A recent change in:</b> | <b>Patients</b> | <b>Doctors</b> | <b>Patient/doctor concordance about inclusion/exclusion</b> |
|------------------------------------------------------------------------------------------------------------|-----------------|----------------|-------------------------------------------------------------|
| Joint pain                                                                                                 | A               | A              | Y                                                           |
| Location of symptoms (i.e., sudden increase in pain or swelling in hands/feet)                             | A               | A              | Y                                                           |
| The feeling of heat in joints                                                                              | DK              | DK             | N                                                           |
| Early morning stiffness                                                                                    | DK              | A              | N                                                           |
| The number of inflamed joints                                                                              | DK              | A              | N                                                           |
| The number of throbbing joints                                                                             | DK              | A              | N                                                           |
| The number of burning joints                                                                               | DK              | DK             | N                                                           |
| The number of tender and/or sore joints                                                                    | A               | A              | Y                                                           |
| Tendon and ligament pain                                                                                   | DK              | A              | N                                                           |
| The number of aching joints                                                                                | A               | A              | Y                                                           |
| Back pain status                                                                                           | DK              | DK             | N                                                           |
| The level of general comfort/discomfort                                                                    | A               | DK             | N                                                           |
| The number or presence of frozen joints                                                                    | DK              | DK             | N                                                           |
| The presence or degree of limping                                                                          | DK              | DK             | N                                                           |
| The presence or degree of nausea and/or sickness                                                           | D               | D              | Y                                                           |
| The presence or degree of weak grip                                                                        | DK              | DK             | N                                                           |
| The presence or degree of pressure sensitive joints                                                        | DK              | DK             | N                                                           |
| The presence or degree of numb joints                                                                      | DK              | D              | N                                                           |
| The feeling of tightness in the joints                                                                     | DK              | DK             | N                                                           |

A: agree (more than 70% scored the item 6 or above)

D: disagree (more than 70% scored the item as 5 or below)

DK: don't know (no consensus found)

Y = yes; N = no

**Supplementary Table 2B: New and/or previous joint items agreed in the second survey.**

| <b>Joint items – Please rate the ability of each item to identify flare.<br/>A recent change in:</b> | <b>Patients</b> | <b>Doctors</b> | <b>Patient/doctor concordance about inclusion/exclusion</b> |
|------------------------------------------------------------------------------------------------------|-----------------|----------------|-------------------------------------------------------------|
| The presence or degree of pressure sensitive joints                                                  | A               | A              | Y                                                           |
| Swollen joints                                                                                       | A               | A              | Y                                                           |
| Night pain                                                                                           | A               | A              | Y                                                           |

A: agree (more than 70% scored the item 6 or above)

D: disagree (more than 70% scored the item as 5 or below)

DK: don't know (no consensus found)

Y = yes; N = no

**Supplementary Table 3: Emotional items in first survey. No new items or change in status of existing items occurred with second survey.**

| <b>Emotional items – Please rate the ability of each item to identify flare.<br/>A recent change in:</b> | <b>Patients</b> | <b>Doctors</b> | <b>Patient/doctor concordance about inclusion/exclusion</b> |
|----------------------------------------------------------------------------------------------------------|-----------------|----------------|-------------------------------------------------------------|
| Feelings of frustration and/or annoyance                                                                 | DK              | D              | N                                                           |
| Feelings of depression and/or distress                                                                   | DK              | DK             | N                                                           |
| Feelings of embarrassment                                                                                | DK              | DK             | N                                                           |
| Feelings of fear and/or anxiety                                                                          | DK              | D              | N                                                           |
| Cognition                                                                                                | D               | D              | Y                                                           |
| Feelings of tearfulness and/or crying or feeling down                                                    | DK              | D              | N                                                           |
| Level of worrying                                                                                        | DK              | D              | N                                                           |
| Feelings of anger                                                                                        | DK              | D              | N                                                           |
| Feeling that the situation is unbearable and/or wanting to remove oneself from the picture               | D               | DK             | N                                                           |
| Feelings of grumpiness                                                                                   | DK              | D              | N                                                           |
| Feelings that you don't want to do anything and/or can't be bothered                                     | DK              | D              | N                                                           |
| Feeling traumatised                                                                                      | D               | D              | Y                                                           |
| Feelings of uselessness                                                                                  | DK              | D              | N                                                           |
| Feelings of being fed up                                                                                 | DK              | D              | N                                                           |
| Feeling scared                                                                                           | D               | D              | Y                                                           |
| Feelings of irritability and/or moodiness                                                                | DK              | D              | N                                                           |

A: agree (more than 70% scored the item 6 or above)

D: disagree (more than 70% scored the item as 5 or below)

DK: don't know (no consensus found)

Y = yes; N = no

**Supplementary Table 4: Participation items in first survey. No new items or change in status of existing items occurred with second survey.**

| <b>Participation items – Please rate the ability of each item to identify flare.<br/>A recent change in:</b> | <b>Patients</b> | <b>Doctors</b> | <b>Patient/doctor concordance about inclusion/exclusion</b> |
|--------------------------------------------------------------------------------------------------------------|-----------------|----------------|-------------------------------------------------------------|
| Motivation                                                                                                   | DK              | D              | N                                                           |
| Level of independence                                                                                        | DK              | DK             | N                                                           |
| The ability to move easily                                                                                   | DK              | DK             | N                                                           |
| Engagement with hobbies                                                                                      | DK              | DK             | N                                                           |
| Functional abilities                                                                                         | DK              | A              | N                                                           |
| Ability to perform normal activities, e.g., activities of daily living                                       | DK              | A              | N                                                           |
| Relationships                                                                                                | DK              | D              | N                                                           |
| Ability to concentrate                                                                                       | DK              | D              | N                                                           |
| Social and/or physical activities                                                                            | DK              | DK             | N                                                           |
| Quality of life                                                                                              | DK              | A              | N                                                           |
| Ability to do job                                                                                            | DK              | A              | N                                                           |
| Wanting physical contact, e.g., being touched                                                                | D               | D              | Y                                                           |
| Feeling clumsy                                                                                               | DK              | D              | N                                                           |

A: agree (more than 70% scored the item 6 or above)

D: disagree (more than 70% scored the item as 5 or below)

DK: don't know (no consensus found)

Y = yes; N = no

**Supplementary Table 5A: Fatigue items in first survey.**

| <b>Fatigue items – Please rate the ability of each item to identify flare.<br/>A recent change in:</b> | <b>Patients</b> | <b>Doctors</b> | <b>Patient/doctor concordance about inclusion/exclusion</b> |
|--------------------------------------------------------------------------------------------------------|-----------------|----------------|-------------------------------------------------------------|
| Feeling tired                                                                                          | A               | DK             | N                                                           |
| Energy levels                                                                                          | A               | DK             | N                                                           |
| Weariness                                                                                              | A               | DK             | N                                                           |
| Sleep patterns or quality of sleep                                                                     | A               | DK             | N                                                           |
| Feeling lethargic                                                                                      | A               | DK             | N                                                           |
| Feeling exhausted                                                                                      | A               | DK             | N                                                           |
| Feeling debilitated                                                                                    | DK              | DK             | N                                                           |
| Feeling slowed down                                                                                    | A               | DK             | N                                                           |

A: agree (more than 70% scored the item 6 or above)

D: disagree (more than 70% scored the item as 5 or below)

DK: don't know (no consensus found)

Y = yes; N = no

**Supplementary Table 5B: New and/or previous fatigue items agreed in the second survey.**

| <b>Fatigue items – Please rate the ability of each item to identify flare.<br/>A recent change in:</b> | <b>Patients</b> | <b>Doctors</b> | <b>Patient/doctor concordance about inclusion/exclusion</b> |
|--------------------------------------------------------------------------------------------------------|-----------------|----------------|-------------------------------------------------------------|
| Feeling debilitated                                                                                    | A               | DK             | N                                                           |

A: agree (more than 70% scored the item 6 or above)

D: disagree (more than 70% scored the item as 5 or below)

DK: don't know (no consensus found)

Y = yes; N = no

**Supplementary Table 6A: Unclassified items in first survey.**

| Unclassified items – Please rate the ability of each item to identify flare.<br>A recent change in: | Patients | Doctors | Patient/doctor concordance about inclusion/exclusion |
|-----------------------------------------------------------------------------------------------------|----------|---------|------------------------------------------------------|
| Appetite                                                                                            | DK       | D       | N                                                    |
| Weight                                                                                              | DK       | D       | N                                                    |
| Feeling flu like, e.g., viral response                                                              | DK       | DK      | N                                                    |
| Self medication/management                                                                          | DK       | DK      | N                                                    |
| Blood results                                                                                       | D        | DK      | N                                                    |
| Unpredictable symptoms                                                                              | D        | D       | Y                                                    |
| Self reported flare                                                                                 | DK       | A       | N                                                    |
| The timing of symptoms                                                                              | D        | DK      | N                                                    |
| The duration of symptoms                                                                            | DK       | DK      | N                                                    |
| The number or combination of symptoms                                                               | DK       | DK      | N                                                    |

A: agree (more than 70% scored the item 6 or above)

D: disagree (more than 70% scored the item as 5 or below)

DK: don't know (no consensus found)

Y = yes; N = no



**Supplementary Table 6B: New and/or previous unclassified items agreed in the second survey.**

| Unclassified items – Please rate the ability of each item to identify flare.<br>A recent change in: | Patients | Doctors | Patient/doctor concordance about inclusion/exclusion |
|-----------------------------------------------------------------------------------------------------|----------|---------|------------------------------------------------------|
| The duration of symptoms                                                                            | DK       | A       | N                                                    |
| The number or combination of symptoms                                                               | A        | A       | Y                                                    |

A: agree (more than 70% scored the item 6 or above)

D: disagree (more than 70% scored the item as 5 or below)

DK: don't know (no consensus found)

Y = yes; N = no
